# Supplementary material
Source: Springer Nature journal article supplement (https://www.springermedizin.de/resource/supplementary/12990_2008_193_MOESM3_ESM.pdf/9612762)

**A**

Vehicle

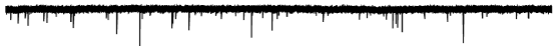+ TNF $\alpha$ 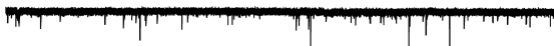**B**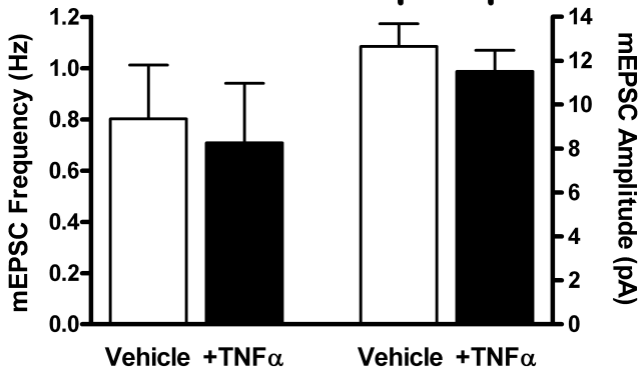

Supplement: MOESM3 [file 9612762]
